# Supplementary material
Source: PubMed Central journal article supplement (PMC2631402)
Supplement: NIHMS66430-supplement-1.pdf [file NIHMS66430-supplement-1.pdf]

## Supplementary Table 1: Dot/Icm translocated substrates

### A: Substrates based on similarity to eukaryotic proteins

| <b><u>Protein</u></b>                   | <b><u>Gene</u></b> | <b><u>Domain/Function</u></b>                  | <b><u>Evidence for Translocation<sup>a</sup></u></b> |
|-----------------------------------------|--------------------|------------------------------------------------|------------------------------------------------------|
| LepA <sup>1</sup>                       | lpg2793            | coiled-coil domain/ bacterial egress           | CA, BLA                                              |
| LepB <sup>1,2</sup>                     | lpg2490            | coiled-coil domain, Rab1 GAP, bacterial egress | CA                                                   |
| LegA2 <sup>3</sup>                      | lpg2215            | ankyrin repeat                                 | BLA                                                  |
| LegA3/AnkH<br>/AnkW <sup>3-5</sup>      | lpg2300            | ankyrin repeat                                 | BLA                                                  |
| LegAS4/AnkI <sup>3,4</sup>              | lpg1718            | ankyrin repeat                                 | BLA                                                  |
| LegA5/AnkK <sup>3,4</sup>               | lpg2322            | ankyrin repeat                                 | BLA                                                  |
| LegA7/AnkG/<br>AnkZ <sup>3-5</sup>      | lpg0401            | ankyrin repeat                                 | CA                                                   |
| LegA8/AnkN<br>/AnkX <sup>3-5</sup>      | lpg0695            | ankyrin repeat                                 | BLA                                                  |
| LegA9/AnkY <sup>3,5</sup>               | lpg0402            | ankyrin repeat                                 | CA                                                   |
| LegA10/<br>AnkQ <sup>3,4,6</sup>        | lpg0038            | ankyrin repeat                                 | CA, BLA                                              |
| LegA11/<br>AnkJ <sup>3,4,6</sup>        | lpg0436            | ankyrin repeat                                 | CA, BLA                                              |
| LegA12/<br>AnkC <sup>3,4</sup>          | lpg0483            | ankyrin repeat                                 | BLA                                                  |
| LegA14/Ceg31<br>/AnkF <sup>3,4,7</sup>  | lpg2452            | ankyrin repeat                                 | BLA                                                  |
| LegA15/<br>AnkD <sup>3,4</sup>          | lpg2456            | ankyrin repeat                                 | BLA                                                  |
| LegAU13/<br>Ceg27/AnkB <sup>3,4,8</sup> | lpg2144            | F-box, ankyrin repeat                          | BLA                                                  |

|                                |         |                                                 |                 |
|--------------------------------|---------|-------------------------------------------------|-----------------|
| LegC3 <sup>3</sup>             | lpg1701 | coiled-coil domain                              | BLA             |
| LegC4 <sup>3</sup>             | lpg1953 | coiled-coil domain                              | BLA             |
| LegC5/Lgt3 <sup>3,9</sup>      | lpg1488 | coiled-coil domain; glucosyltransferase of EF1A | CA, BLA         |
| LegC6 <sup>3,10</sup>          | lpg1588 | coiled-coil domain                              | CA, BLA         |
| LegC8/Lgt2 <sup>3,9</sup>      | lpg2862 | coiled-coil domain; glucosyltransferase of EF1A | BLA             |
| LegC7/YlfA <sup>3,7</sup>      | lpg2298 | coiled-coil domain                              | CA, BLA         |
| LegC2/YlfB <sup>3,7</sup>      | lpg1884 | coiled-coil domain                              | CA, BLA         |
| LegG1 <sup>3</sup>             | lpg1976 | UVB-resistance protein UVR8                     | CA, BLA         |
| LegG2 <sup>3</sup>             | lpg0276 | Ras GEF                                         | CA, BLA         |
| LegK2 <sup>3</sup>             | lpg2137 | serine/threonine protein kinase                 | BLA             |
| LegK3 <sup>3</sup>             | lpg2556 | serine/threonine protein kinase                 | BLA             |
| LegL1 <sup>3</sup>             | lpg0945 | leucine-rich repeat                             | BLA             |
| LegL2 <sup>3</sup>             | lpg1602 | leucine-rich repeat                             | BLA             |
| LegL3 <sup>3</sup>             | lpg1660 | leucine-rich repeat                             | CA, BLA         |
| LegLC4 <sup>3</sup>            | lpg1948 | leucine-rich repeat, coiled-coil domain         | CA, BLA         |
| LegL5 <sup>3,10</sup>          | lpg1958 | leucine-rich repeat                             | CA, BLA         |
| LegL7 <sup>3</sup>             | lpg2400 | leucine-rich repeat                             | CA, BLA         |
| LegLC8 <sup>3,10</sup>         | lpg1890 | leucine-rich repeat, coiled-coil domain         | CA, BLA         |
| LegP <sup>3,11</sup>           | lpg2999 | astacin protease                                | BLA             |
| LegS2 <sup>3</sup>             | lpg2176 | sphingosine 1-phosphate lyase                   | BLA             |
| LegU1 <sup>3</sup>             | lpg0171 | F-box                                           | BLA             |
| LegU2/<br>LubX <sup>3,10</sup> | lpg2830 | U-box; Ubiquitination of Clk                    | CYA, CA,<br>BLA |

**B: Substrates identified by directly assaying for Dot/Icm-dependent translocation**

| <b><u>Protein</u></b>    | <b><u>Gene</u></b> | <b><u>Domain/Function</u></b>                  | <b><u>Evidence for Translocation<sup>a</sup></u></b> |
|--------------------------|--------------------|------------------------------------------------|------------------------------------------------------|
| SidA <sup>12,13</sup>    | lpg0621            | hypothetical protein                           | IT, CA                                               |
| SidB <sup>12,13</sup>    | lpg1642            | Rtx toxin/lipase                               | IT, CA                                               |
| SidC <sup>12,13</sup>    | lpg2511            | PI(4)P binding domain/vesicle trafficking      | IF, PNS, ST, CA                                      |
| SidD <sup>12,13</sup>    | lpg2465            | hypothetical protein                           | IT, CA                                               |
| SidE <sup>12,13</sup>    | lpg0234            | hypothetical protein                           | IT, CA                                               |
| SdeA <sup>13</sup>       | lpg0257            | hypothetical protein                           | IT                                                   |
| SdeC <sup>13</sup>       | lpg2157            | hypothetical protein                           | IT                                                   |
| SidF <sup>12-14</sup>    | lpg2584            | Bcl2-rambo and BNIP3 binding/anti-apoptosis    | IT, IF, CA                                           |
| SidG <sup>12,13,15</sup> | lpg1355            | coiled-coil domain                             | CA, IT                                               |
| SidH <sup>12,13</sup>    | lpg2829            | hypothetical protein                           | CA, IT                                               |
| SdhA <sup>16</sup>       | lpg0376            | GRIP domain, coiled-coil domain/anti-apoptosis | SE                                                   |

**C: Substrates identified in yeast ectopic overexpression studies**

| <b><u>Protein</u></b>     | <b><u>Gene</u></b> | <b><u>Domain/Function</u></b>                  | <b><u>Evidence for Translocation<sup>a</sup></u></b> |
|---------------------------|--------------------|------------------------------------------------|------------------------------------------------------|
| VipA <sup>17</sup>        | lpg0390            | hypothetical protein /vesicle trafficking      | CA                                                   |
| VipD <sup>17,18</sup>     | lpg2831            | patatin-like phospholipase/vesicle trafficking | CA, ST, SE                                           |
| VipF <sup>17</sup>        | lpg0103            | acetyltransferase/vesicle trafficking          | CA                                                   |
| YlfA/LegC7 <sup>3,7</sup> | lpg2298            | coiled-coil domain/vesicle trafficking         | CA                                                   |
| YlfB/LegC2 <sup>3,7</sup> | lpg1884            | coiled-coil domain                             | CA                                                   |

**D: Substrates identified based on regulatory networks**

| <b><u>Protein</u></b>        | <b><u>Gene</u></b> | <b><u>Domain/Function</u></b> | <b><u>Evidence for Translocation<sup>a</sup></u></b> |
|------------------------------|--------------------|-------------------------------|------------------------------------------------------|
| Ceg7 <sup>6</sup>            | lpg0227            | hypothetical protein          | CA                                                   |
| Ceg18 <sup>6</sup>           | lpg0898            | hypothetical protein          | CA                                                   |
| Ceg33 <sup>6</sup>           | lpg2591            | hypothetical protein          | CA                                                   |
| Ceg10 <sup>8</sup>           | lpg0284            | hypothetical protein          | CA                                                   |
| Ceg23 <sup>8</sup>           | lpg1621            | hypothetical protein          | CA                                                   |
| Ceg29 <sup>8</sup>           | lpg2409            | hypothetical protein          | CA                                                   |
| CegC1 <sup>6</sup>           | lpg0012            | hypothetical protein          | CA                                                   |
| CegC2 <sup>6</sup>           | lpg0126            | ninein, eukaryotic NIN gene   | CA                                                   |
| CegC3 <sup>6</sup>           | lpg1144            | hypothetical protein          | CA                                                   |
| CegC4 <sup>6</sup>           | lpg2200            | hypothetical protein          | CA                                                   |
| LegA10/AnkQ <sup>3,4,6</sup> | lpg0038            | ankyrin repeat                | CA, BLA                                              |
| LegA11/AnkJ <sup>3,4,6</sup> | lpg0436            | ankyrin repeat                | CA, BLA                                              |

**E: Substrate identified by a putative Dot/Icm translocation signal**

| <b><u>Protein</u></b> | <b><u>Gene</u></b> | <b><u>Domain/Function</u></b> | <b><u>Evidence for Translocation<sup>a</sup></u></b> |
|-----------------------|--------------------|-------------------------------|------------------------------------------------------|
| Lpg0045 <sup>10</sup> | lpg0045            | hypothetical protein          | CA                                                   |
| Lpg0081 <sup>10</sup> | lpg0081            | hypothetical protein          | CA                                                   |
| Lpg0294 <sup>10</sup> | lpg0294            | hypothetical protein          | CA                                                   |
| Lpg0365 <sup>10</sup> | lpg0365            | hypothetical protein          | CA                                                   |
| Lpg0518 <sup>10</sup> | lpg0518            | hypothetical protein          | CA                                                   |
| Lpg0634 <sup>10</sup> | lpg0634            | hypothetical protein          | CA                                                   |

|                       |         |                      |    |
|-----------------------|---------|----------------------|----|
| Lpg0963 <sup>10</sup> | lpg0963 | hypothetical protein | CA |
| Lpg1148 <sup>10</sup> | lpg1148 | hypothetical protein | CA |
| Lpg1158 <sup>10</sup> | lpg1158 | hypothetical protein | CA |
| Lpg1273 <sup>10</sup> | lpg1273 | hypothetical protein | CA |
| Lpg1689 <sup>10</sup> | lpg1689 | hypothetical protein | CA |
| Lpg1717 <sup>10</sup> | lpg1717 | hypothetical protein | CA |
| Lpg1751 <sup>10</sup> | lpg1751 | hypothetical protein | CA |
| Lpg2327 <sup>10</sup> | lpg2327 | hypothetical protein | CA |
| Lpg2407 <sup>10</sup> | lpg2407 | hypothetical protein | CA |
| Lpg2527 <sup>10</sup> | lpg2527 | coiled-coil domain   | CA |
| Lpg2744 <sup>10</sup> | lpg2744 | hypothetical protein | CA |

#### **F: Substrates identified by alternative mechanisms**

| <b><u>Protein</u></b>      | <b><u>Gene</u></b> | <b><u>Domain/Function</u></b>            | <b><u>Evidence for Translocation<sup>a</sup></u></b> |
|----------------------------|--------------------|------------------------------------------|------------------------------------------------------|
| RalF <sup>19</sup>         | lpg1950            | Arf1 GEF, ARF1 recruitment               | CA, IF                                               |
| SidM/DrrA <sup>20,21</sup> | lpg2464            | Rab1 GEF, Rab1 GDI/Rab1 recruitment      | CA, IF, PNS                                          |
| LidA <sup>20,22</sup>      | lpg0940            | coiled-coil domain/Rab1 sequestering     | IF, PNS                                              |
| SidJ <sup>9,23</sup>       | lpg2155            | hypothetical protein/vesicle recruitment | SE, ST, CA                                           |
| SdjA <sup>9,23</sup>       | lpg2508            | hypothetical protein                     | ST, CA                                               |
| VpdA <sup>18</sup>         | lpg2410            | patatin-like phospholipase               | SE, ST                                               |
| VpdB <sup>18</sup>         | lpg1227            | patatin-like phospholipase               | SE, ST                                               |
| WipA <sup>15</sup>         | lpg2718            | hypothetical protein                     | CA                                                   |
| WipB <sup>15</sup>         | lpg0642            | hypothetical protein                     | CA                                                   |

<sup>a</sup>CA: cya-fusion assay; IF: immunofluorescence microscopy; IT: inter-bacterial transfer; PNS: protein present on phagosomes isolated from postnuclear supernatants of infected cells; SE: saponin extraction; ST: SidC-based translocation assay; BLA: fusions to  $\beta$ -lactamase<sup>24</sup>.

## SUPPLEMENTARY TABLE REFERENCES

1. Chen, J. et al. *Legionella* effectors that promote nonlytic release from protozoa. *Science* **303**, 1358-1361 (2004).
2. Ingmundson, A., Delprato, A., Lambright, D.G. & Roy, C.R. *Legionella pneumophila* proteins that regulate Rab1 membrane cycling. *Nature* **450**, 365-9 (2007).
3. de Felipe, K.S. et al. Evidence for acquisition of *Legionella* type IV secretion substrates via interdomain horizontal gene transfer. *J Bacteriol* **187**, 7716-26 (2005).
4. Habyarimana, F. et al. Role for the Ankyrin eukaryotic-like genes of *Legionella pneumophila* in parasitism of protozoan hosts and human macrophages. *Environ Microbiol* **10**, 1460-74 (2008).
5. Pan, X., Luhrmann, A., Satoh, A., Laskowski-Arce, M.A. & Roy, C.R. Ankyrin repeat proteins comprise a diverse family of bacterial type IV effectors. *Science* **320**, 1651-4 (2008).
6. Altman, E. & Segal, G. The response regulator CpxR directly regulates the expression of several *Legionella pneumophila* *icm/dot* components as well as new translocated substrates. *J Bacteriol* **190**, 1986-96 (2008).
7. Campodonico, E.M., Chesnel, L. & Roy, C.R. A yeast genetic system for the identification and characterization of substrate proteins transferred into host
